# Supplementary material
Source: PubMed Central journal article supplement (PMC10141274)
Supplement: jamaoncol-e230187-s001.pdf [file jamaoncol-e230187-s001.pdf]

## Supplemental Online Content

Bueno-Muiño C, Echavarría I, López-Tarruella S, et al. Assessment of a genomic assay in patients with *ERBB2*-positive breast cancer following neoadjuvant trastuzumab-based chemotherapy with or without pertuzumab. *JAMA Oncol*. Published online April 27, 2023. doi:10.1001/jamaoncol.2023.0187

**eTable 1.** Patient characteristics of the GOM neoadjuvant cohort according to treatment (TCH versus TCHP)

**eTable 2.** Main patient population of the DAPHNe trial cohort and HER2DX sub-population

**eTable 3.** Main patient population of the ISPY-2 trial cohort with HER2DX data

**eFigure 1.** CONSORT diagram of the GOM cohort

**eFigure 2.** Association of HER2DX pCR score with response to pertuzumab in a combined patient-level analysis from GOM, DAPHNe and ISPY-2 neoadjuvant cohorts (n=362)

**eFigure 3.** Relationship between HER2DX pCR score, treatment and pCR

This supplemental material has been provided by the authors to give readers additional information about their work.

|                                                  | TCH          |       | TCHP         |       |
|--------------------------------------------------|--------------|-------|--------------|-------|
|                                                  | N            | %     | N            | %     |
| N                                                | 67           | -     | 88           | -     |
| <b>Age (mean and range)</b>                      | 52.2 (22-74) |       | 48.8 (27-72) |       |
| <b>Ki67 IHC (mean and range)</b>                 | 36.3 (10-80) |       | 36.9 (1-90)  |       |
| <b>Menopausal*</b>                               |              |       |              |       |
| Pre-menopausal                                   | 32           | 47.8% | 53           | 60.9% |
| Post-menopausal                                  | 35           | 52.2% | 34           | 39.1% |
| <b>Clinical tumor stage</b>                      |              |       |              |       |
| cT1-2                                            | 38           | 56.7% | 61           | 69.3% |
| cT3-4                                            | 29           | 43.3% | 27           | 30.7% |
| <b>Clinical nodal stage</b>                      |              |       |              |       |
| cN0                                              | 29           | 43.3% | 27           | 30.7% |
| cN1-3                                            | 38           | 56.7% | 61           | 69.3% |
| <b>Pathological response (breast and axilla)</b> |              |       |              |       |
| pCR                                              | 35           | 52.2% | 54           | 61.4% |
| Residual disease                                 | 32           | 47.8% | 34           | 38.6% |
| <b>Hormone receptor status</b>                   |              |       |              |       |
| Positive                                         | 43           | 64.2% | 62           | 70.5% |
| Negative                                         | 24           | 35.8% | 26           | 29.5% |
| <b>Intrinsic subtype</b>                         |              |       |              |       |
| Luminal A                                        | 18           | 26.9% | 20           | 22.7% |
| Luminal B                                        | 9            | 13.4% | 17           | 19.3% |
| HER2-enriched                                    | 37           | 55.2% | 43           | 48.9% |
| Basal-like                                       | 2            | 3.0%  | 6            | 6.8%  |
| Normal-like                                      | 1            | 1.5%  | 2            | 2.3%  |

**eTable 1.** Patient characteristics of the GOM neoadjuvant cohort according to treatment (TCH versus TCHP)

|                                                  | HER2DX sub-population |       | Original trial population |       |
|--------------------------------------------------|-----------------------|-------|---------------------------|-------|
|                                                  | N                     | %     | N                         | %     |
| <b>N</b>                                         | 80                    | -     | 98                        | -     |
| <b>Age (mean and range)</b>                      | 50.3 (26-78)          |       | 49.5 (24-78)              |       |
| <b>Clinical tumor stage</b>                      |                       |       |                           |       |
| cT1                                              | 15                    | 18.7% | 18                        | 18.4% |
| cT2-3                                            | 65                    | 81.3% | 80                        | 81.6% |
| <b>Clinical nodal stage</b>                      |                       |       |                           |       |
| cN0                                              | 52                    | 65.0% | 65                        | 66.3% |
| cN1-3                                            | 28                    | 35.0% | 33                        | 36.7% |
| <b>Pathological response (breast and axilla)</b> |                       |       |                           |       |
| pCR                                              | 48                    | 60.0% | 55                        | 56.7% |
| Residual disease                                 | 32                    | 40.0% | 42                        | 43.3% |
| <b>Hormone receptor status</b>                   |                       |       |                           |       |
| Positive                                         | 56                    | 70.0% | 65                        | 66.3% |
| Negative                                         | 24                    | 30.0% | 33                        | 33.7% |

Abbreviations: pCR, pathologic complete response.

**eTable 2.** Main patient population of the DAPHNe trial cohort and HER2DX sub-population

| Characteristic                       | T-DM1/P<br>(n = 52) | THP<br>(n = 45) | CONTROL<br>(n = 31) |
|--------------------------------------|---------------------|-----------------|---------------------|
| <b>Median age, yr (range)</b>        | 48 (33–72)          | 47 (29–70)      | 50 (29–71)          |
| <b>Ethnicity, n (%)</b>              |                     |                 |                     |
| White                                | 42 (81%)            | 37 (82%)        | 25 (81%)            |
| African American                     | 4 (8%)              | 4 (9%)          | 2 (6%)              |
| Asian                                | 5 (10%)             | 2 (4%)          | 4 (13%)             |
| Other/mixed                          | 1 (2%)              | 2 (4%)          | 0 (0%)              |
| <b>HR Status, n (%)</b>              |                     |                 |                     |
| Positive                             | 35 (67%)            | 29 (64%)        | 19 (61%)            |
| Negative                             | 17 (33%)            | 16 (36%)        | 12 (39%)            |
| <b>Median tumor size, cm (range)</b> | 3.3 (1.5–12)        | 3.4 (1.8–9)     | 3.5 (1.3–11.7)      |
| <b>Baseline node status, n (%)</b>   |                     |                 |                     |
| Palpable                             | 18 (35%)            | 17 (38%)        | 10 (32%)            |
| Non-palpable                         | 24 (46%)            | 22 (49%)        | 21 (68%)            |
| N/A                                  | 10 (19%)            | 6 (13%)         | 0 (0%)              |
| <b>HER2 qualifying test, n (%)</b>   |                     |                 |                     |
| IHC                                  | 35 (67%)            | 30 (67%)        | 18 (58%)            |
| FISH                                 | 17 (33%)            | 15 (33%)        | 13 (42%)            |
| <b>HER2 IHC, n (%)</b>               |                     |                 |                     |
| IHC 3+                               | 35 (67%)            | 30 (67%)        | 17 (55%)            |
| IHC 2+                               | 10 (19%)            | 8 (18%)         | 6 (19%)             |
| IHC 1+                               | 2 (4%)              | 1 (2%)          | 1 (3%)              |
| Not reported                         | 5 (10%)             | 6 (13%)         | 7 (23%)             |
| <b>HER2 FISH, n (%)</b>              |                     |                 |                     |
| Positive                             | 29 (56%)            | 25 (56%)        | 15 (48%)            |
| Equivocal                            | 0 (0%)              | 0 (0%)          | 1 (3%)              |
| Negative                             | 1 (2%)              | 0 (0%)          | 1 (3%)              |
| Not reported                         | 22 (42%)            | 20 (44%)        | 14 (45%)            |

**eTable 3.** Main patient population of the ISPY-2 trial cohort with HER2DX data  
The table has been obtained from Clark et al.

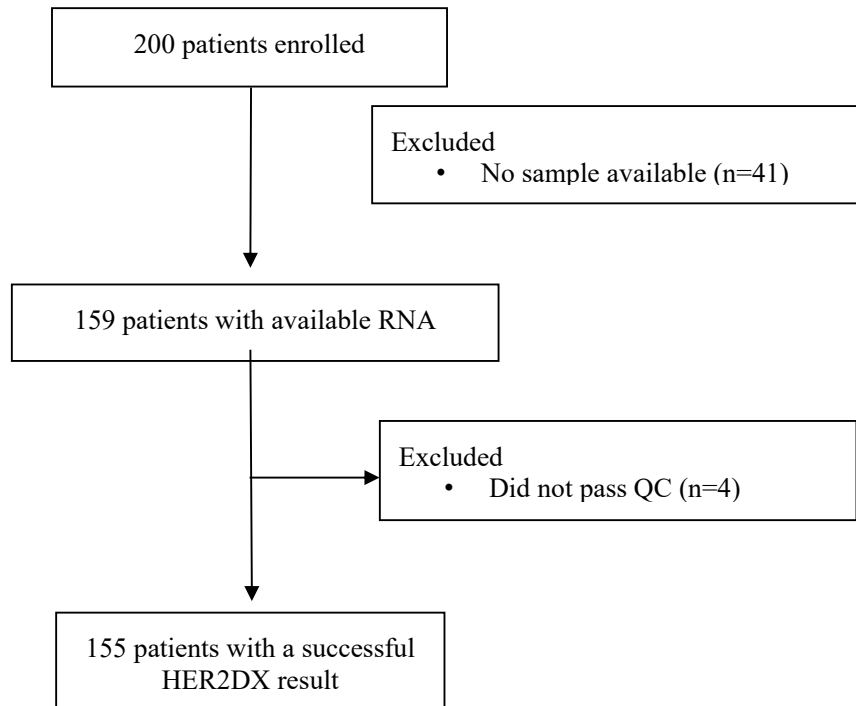

**eFigure 1.** CONSORT diagram of the GOM cohort

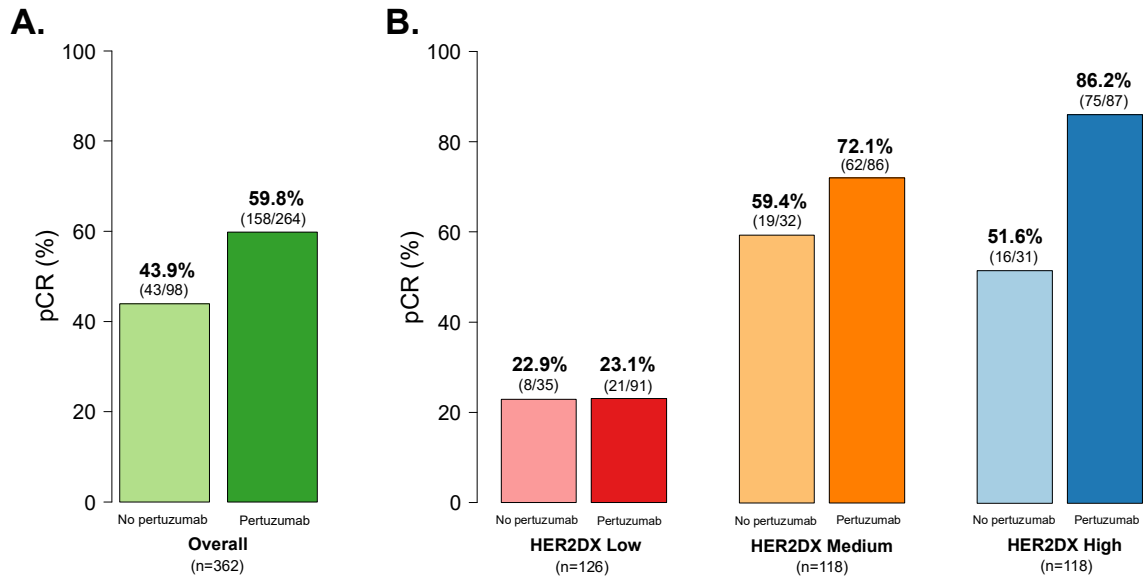

**eFigure 2.** Association of HER2DX pCR score with response to pertuzumab in a combined patient-level analysis from GOM, DAPHNe and ISPY-2 neoadjuvant cohorts (n=362)  
**(A)** pCR rates according to pertuzumab use in the combined cohort. **(B)** pCR rates according to HER2DX pCR score groups and pertuzumab use.

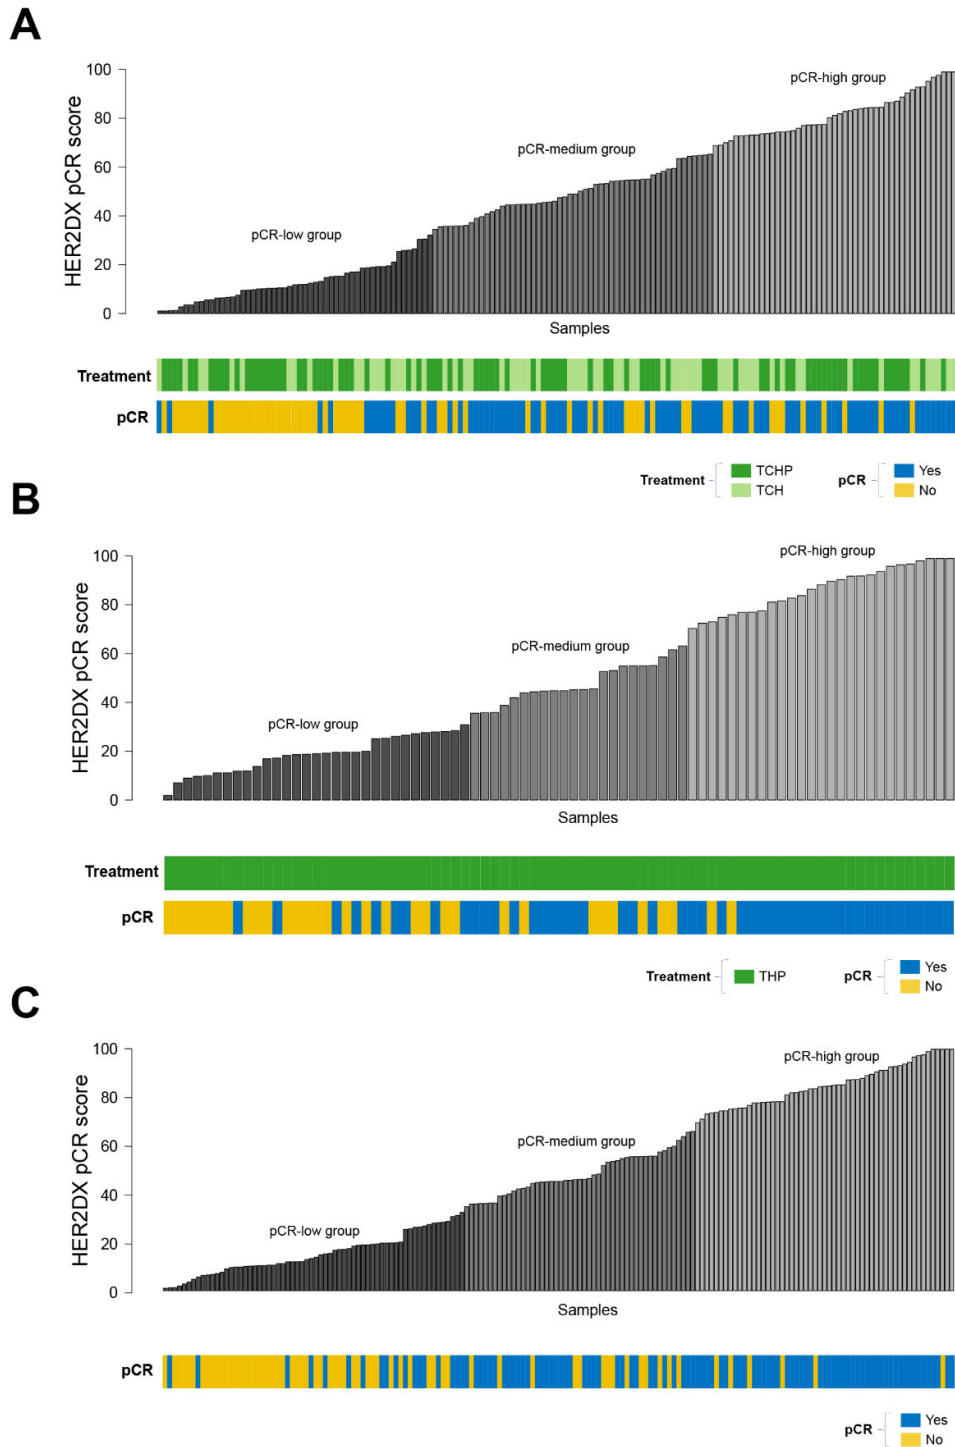

**Figure 3.** Relationship between HER2DX pCR score, treatment and pCR (A) GOM cohort; (B) DAPHNe cohort; (C) combined cohort.
