# Supplementary material
Source: PubMed Central journal article supplement (PMC10141274)
Supplement: jamaoncol-e230187-s002.pdf [file jamaoncol-e230187-s002.pdf]

## Data Sharing Statement

Bueno-Muiño. Assessment of a Genomic Assay in Patients With *ERBB2*-Positive Breast Cancer Following Neoadjuvant Trastuzumab-Based Chemotherapy With or Without Pertuzumab. *JAMA Oncol*. Published April 27, 2023. doi:10.1001/jamaoncol.2023.0187

### Data

**Data available:** Yes

**Data types:** Deidentified participant data

**How to access data:** [mmartin@geicam.org](mailto:mmartin@geicam.org)

**When available:** With publication

### Supporting Documents

**Document types:** Other (please specify)

**Additional Information:** Protocol

**How to access documents:** [mmartin@geicam.org](mailto:mmartin@geicam.org)

**When available:** With publication

### Additional Information

**Who can access the data:** Proposals for any purpose will be considered.

**Types of analyses:** Proposals for any purpose will be considered.

**Mechanisms of data availability:** Proposals for any purpose will be considered.
